# Supplementary material for: Geochemical characteristics of dissolved heavy metals in Zhujiang River, Southwest China: spatial-temporal distribution, source, export flux estimation, and a water quality assessment
Source: PeerJ. 2019 Mar 13;7:e6578. doi: 10.7717/peerj.6578 (PMC6420802; doi:10.7717/peerj.6578)
Supplement: Supplemental Information 4 — Raw data of measured dissolved heavy metal concentrations for the Figures 2 and 3 in the main files. The coordinates of sampling locations and sampling date. [file peerj-07-6578-s004.xlsx]

## Sheet: Sheet1
Site number	River reach	Sample location	Date (m-d-y)	WQI	V	Cr	Mn	Co	Ni	Cu	Mo	Cd	Ba	Pb
					μg L-1	μg L-1	μg L-1	μg L-1	μg L-1	μg L-1	μg L-1	μg L-1	μg L-1	μg L-1
High flow season
1	NPR	N：25º54.376' E：103º57.101'	07/18/14	8.33162	2.10842	4.74764	11.3587	0.0844598	10.0277	68.8613	0.133742	0.0328877	4.00364	0.0705041
2	NPR	N：25º36.971' E：103º49.532'	07/19/14	7.62256	2.57222	10.4841	0.39175	0.159455	8.50126	50.298	0.403791	0.0215852	14.776	0.0847721
3	NPR	N：25º17.512' E：103º51.405'	07/19/14	6.67827	2.80932	11.6631	0.761716	0.143398	6.80544	4.29672	0.398867	0.0273202	26.0907	0.0361738
4	NPR	N：25º00.589' E：103º38.313'	07/19/14	5.12862	2.97096	13.8974	0.397865	0.153071	2.74717	1.03867	0.545324	0.0304917	19.7158	0.0642025
5	NPR	N：24º56.169' E：103º10.674'	07/19/14	4.11003	3.09097	8.29578	1.62369	0.134845	2.79642	0.955139	0.783732	0.032866	28.389	0.0302793
6	NPR	N：24º13.314' E：103º06.415'	07/20/14	4.75345	3.06711	11.8802	0.164253	0.193522	2.84196	1.1057	0.848705	0.0284423	24.1337	0.0476596
7	T-NPR	N：24º12.664' E：103º06.806'	07/20/14	11.6681	3.33786	9.96774	0.217453	0.170235	16.7249	20.4263	0.782406	0.0534193	48.3992	0.0804926
8	T-NPR	N：24º13.778' E：103º23.804'	07/19/14	27.8735	3.48187	14.8652	0.473608	0.190346	49.0321	29.0185	0.52478	0.0310224	20.5637	0.0489516
9	T-NPR	N：24º39.257' E：104º28.790'	07/20/14	3.98553	2.42807	10.8544	0.144583	0.11013	2.38374	1.16512	0.409451	0.0280451	8.21544	0.0371336
10	NPR	N：24º39.293' E：104º28.732'	07/20/14	4.10913	2.63224	10.8547	0.135229	0.136096	2.30905	1.80723	0.926042	0.0328163	13.935	0.0364137
11	T-NPR	N：24º46.524' E：104º32.253'	07/20/14	6.33101	2.55693	9.54216	0.126451	0.108521	7.68132	5.2859	0.429273	0.0384357	10.7327	0.0386102
12	T-NPR	N：25º11.607' E：104º54.663'	07/21/14	3.78155	2.65612	6.40334	0.666483	0.1393	3.84917	0.868684	0.503871	0.0363329	9.1427	0.0684009
13	NPR	N：24º52.129' E：105º01.755'	07/21/14	4.9936	2.81356	7.6884	0.160676	0.0839297	5.80253	1.22348	0.895322	0.0273251	12.333	0.0341362
14	T-BPR	N：26º00.141' E：104º30.067'	07/18/14	14.6797	2.5027	8.48361	0.363945	0.0887157	24.7342	5.42545	0.812873	0.0365085	33.8964	0.0442431
15	T-BPR	N：26º17.388' E：104º42.789'	07/18/14	21.2739	2.85694	6.88608	0.566845	0.0877477	37.4644	95.6604	0.617548	0.0322412	13.3932	0.0908247
16	T-BPR	N：26º22.931' E：105º00.733'	07/17/14	18.2284	2.36354	5.18673	134.491	0.506093	2.02745	0.531555	0.961843	0.0358173	13.4883	0.0448439
17	T-BPR	N：26º26.503' E：105º04.567'	07/17/14	3.23915	2.52479	7.67075	0.529302	0.115782	1.94745	0.374132	0.583377	0.0626934	13.457	0.0339324
18	T-BPR	N：26º10.138' E：105º11.266'	07/17/14	2.3438	2.78421	5.74839	0.227823	0.0912444	1.21502	0.455785	0.76208	0.0303391	13.0003	0.0328417
19	T-BPR	N：25º40.338' E：105º39.591'	07/17/14	3.56444	2.27869	8.94176	0.405069	0.122442	2.08556	0.447949	0.602101	0.0196827	11.2952	0.123479
20	T-BPR	N：26º00.774' E：105º40.083'	07/17/14	10.3291	2.39707	9.12889	0.779721	0.130672	12.0279	136.804	0.516359	0.029146	24.7548	0.0917771
21	T-BPR	N：25º53.339' E：105º38.595'	07/17/14	14.6452	2.12927	7.97281	49.6665	0.200989	11.2072	103.17	0.942892	0.0290216	9.14475	0.0366355
22	T-BPR	N：25º52.383' E：105º40.367'	07/17/14	3.53342	2.3351	8.90194	0.758257	0.124537	1.89456	0.533997	0.632371	0.0291191	17.7819	0.0377797
23	T-BPR	N：25º31.932' E：105º45.989'	07/16/14	3.19535	2.30058	7.65855	0.221694	0.11677	2.025	0.584559	0.601864	0.0287745	15.0335	0.0365253
24	T-BPR	N：25º28.012' E：105º46.908'	07/16/14	3.42689	2.37104	8.16807	1.31776	0.136566	1.97669	1.81406	0.655533	0.0288205	13.7995	0.042041
25	T-BPR	N：25º23.054' E：105º45.477'	07/16/14	3.63844	2.53438	9.94359	0.264757	0.144479	1.83534	0.508649	0.526176	0.0306661	14.9748	0.0364343
26	T-BPR	N：25º22.678' E：105º47.127'	07/16/14	4.02291	2.39768	7.93417	6.41115	0.183467	2.11538	0.578324	0.677091	0.0290387	14.0252	0.0443958
27	T-BPR	N：25º06.965' E：105º51.618'	07/15/14	5.08836	2.10161	14.9563	0.599828	0.257436	2.15143	0.239187	0.19549	0.032475	20.514	0.0659967
28	T-BPR	N：25º07.095' E：105º51.757'	07/15/14	4.95399	2.21239	13.333	0.219276	0.26975	2.15393	0.297122	0.249916	0.027423	40.6009	0.0477978
29	T-BPR	N：25º04.399' E：105º57.121'	07/15/14	3.55556	2.32813	8.49599	0.171273	0.136991	2.20359	0.474231	0.675451	0.0264493	19.8811	0.0434579
30	T-BPR	N：25º02.840' E：105º55.993'	07/15/14	3.28895	2.19317	8.94227	0.560313	0.16728	1.47517	0.423268	0.401523	0.024839	12.9795	0.107107
31	T-BPR	N：24º09.598' E：106º05.519'	07/15/14	6.95801	1.95894	12.5542	22.837	0.362776	1.88272	0.408361	0.421264	0.0286821	17.8701	0.0700002
32	T-BPR	N：24º56.984' E：106º08.133'	07/15/14	3.53405	2.25068	7.88764	0.261221	0.0965319	2.28653	0.643752	0.727338	0.0374765	15.4908	0.138351
33	NPR	N：24º56.894' E：106º08.749'	07/15/14	3.59808	2.14245	7.557	0.257394	0.0962714	2.32757	0.524408	0.630404	0.0809188	11.9297	0.220821
34	HSR	N：24º59.741' E：106º09.535'	07/15/14	5.93657	2.12594	9.39564	0.540811	0.114817	5.93088	8.70659	0.54266	0.0417802	32.4485	0.0637158
35	T-HSR	N：24º58.122' E：106º09.510'	07/15/14	10.7197	2.39414	7.45181	0.305279	0.0981894	16.7943	27.4434	0.77302	0.0250753	22.5985	0.0574795
36	HSR	N：25º09.847' E：106º37.839'	07/24/14	2.71252	2.69373	6.99286	0.24179	0.103446	1.42517	0.589439	0.693457	0.0368996	10.3796	0.0392256
37	T-HSR	N：26º05.865' E：106º38.245'	07/24/14	5.20309	2.5048	10.3887	8.11366	0.227382	3.06763	0.447925	0.960077	0.0330852	9.07673	0.0386533
38	T-HSR	N：25º27.515' E：106º46.701'	07/24/14	3.55378	2.3431	9.21044	1.51469	0.10174	2.03979	0.470599	0.258872	0.0339374	4.3431	0.0637354
39	T-HSR	N：25º04.082' E：106º57.780'	07/24/14	2.86364	2.39541	5.09866	0.178359	0.0762847	2.81767	6.75702	0.347212	0.0253798	5.61731	0.0319835
40	HSR	N：24º59.919' E：107º10.015'	07/24/14	3.43136	2.5083	8.27367	0.218353	0.10798	2.31734	1.15866	0.56184	0.0381191	10.4745	0.0366627
41	T-HSR	N：24º50.647' E：107º19.850'	07/25/14	3.79581	2.34352	5.82822	0.71174	0.0965862	3.15489	13.5167	0.348239	0.195041	8.33766	0.0645044
42	T-HSR	N：24º31.637' E：107º45.463'	07/25/14	4.15785	2.40193	9.91381	0.57947	0.120051	3.17207	1.26345	0.215295	0.033046	5.7641	0.0461191
43	T-HSR	N：24º34.169' E：107º49.052'	07/25/14	11.9797	2.3381	6.0955	47.0716	0.192017	3.40666	1.01863	0.594244	1.36382	8.92024	0.223754
44	T-QJR	N：24º42.316' E：108º02.125'	07/25/14	3.51327	2.42041	8.78413	0.174948	0.104466	2.07685	0.726686	0.362502	0.111531	6.69395	0.0423228
45	T-QJR	N：24º34.145' E：108º28.336'	07/25/14	3.4788	2.40379	8.84402	0.336786	0.105685	2.11723	0.518744	0.295723	0.0734124	7.6899	0.0345086
46	T-QJR	N：24º30.130' E：108º37.738'	07/25/14	3.2427	2.43398	7.51272	0.235166	0.108731	2.28697	0.51003	0.319406	0.0727733	8.03981	0.0338299
47	T-QJR	N：24º32.325' E：109º14.632'	07/26/14	3.27777	2.53531	8.17947	0.127333	0.100503	2.05415	0.448177	0.31395	0.0710369	7.91541	0.0429548
48	T-QJR	N：24º32.698' E：109º15.904'	07/26/14	1.68213	2.65612	2.80315	0.701872	0.0362631	1.18571	3.65719	0.279442	0.0416735	11.0235	0.0340691
49	T-QJR	N：24º32.082' E：109º14.962'	07/26/14	2.842	2.45559	5.95066	0.294684	0.0559107	2.30487	0.496525	0.293923	0.0526338	7.96865	0.0318502
50	T-QJR	N：23º50.551' E：109º31.877'	07/26/14	2.91479	2.83743	5.1073	1.47596	0.0714983	2.05694	0.711416	0.40068	0.0672529	19.6255	0.0528247
51	QJR	N：23º40.025' E：109º40.139'	07/26/14	6.53999	2.38717	7.3667	0.327114	0.0960806	8.44602	27.3226	0.345413	0.0682286	10.1391	0.0393997
52	QJR	N：23º36.249' E：109º38.862'	07/26/14	3.45401	2.46235	8.84599	0.421616	0.138989	1.87337	0.4758	0.387409	0.0812056	10.5009	0.0445696
53	QJR	N：23º24.696' E：110º04.310'	07/27/14	3.77854	2.45519	7.51997	0.11013	0.0844227	3.2484	0.769635	0.348841	0.0743973	12.3698	0.0436817
54	T-XUR	N：22º49.966' E：108º05.609'	07/31/14	8.09517	2.73018	7.8711	0.324671	0.393382	12.1355	8.88627	0.163788	0.024829	11.9256	0.0288555
55	T-XUR	N：22º50.682' E：108º05.743'	07/31/14	3.14038	3.53344	8.25889	0.183264	0.109374	1.83696	0.740476	0.621902	0.0231458	10.1111	0.0227752
56	T-XUR	N：22º49.395' E：108º11.372'	07/31/14	3.74426	3.30546	8.1458	0.77581	0.120786	1.95876	0.515868	0.463475	0.0307777	11.695	0.445938
57	T-XUR	N：22º54.480' E：109º34.174'	07/30/14	2.92039	3.18359	6.62271	0.189083	0.0971252	1.98731	0.836328	0.433835	0.0359435	13.4587	0.0471883
58	T-XUR	N：23º22.370' E：110º04.851'	07/27/14	2.45344	2.72545	4.93316	3.63749	0.0814408	1.08284	0.674056	0.378507	0.0349111	11.3934	0.0503659
59	XUR	N：23º26.103' E：110º07.647'	07/27/14	2.46845	2.75318	6.60621	0.192305	0.115874	1.23149	0.556058	0.309257	0.0284635	11.1603	0.0311871
60	XUR	N：23º25.594' E：110º31.940'	07/27/14	2.66417	3.0558	6.58877	0.115474	0.0825566	1.54447	0.652788	0.428516	0.0280621	13.6704	0.0377859
61	T-XUR	N：23º24.980' E：110º31.817'	07/27/14	3.78328	2.63952	5.17962	16.58	0.0751417	0.595108	0.483085	0.149845	0.0267187	12.501	0.07835
62	XUR	N：23º25.359' E：110º32.275'	07/27/14	2.49342	2.89753	6.39689	0.174652	0.068882	1.32923	0.460891	0.355428	0.0299683	12.5773	0.0318469
63	XUR	N：23º21.571' E：110º51.468'	07/27/14	2.5419	3.07746	6.26264	0.244264	0.0892486	1.40177	0.664127	0.444908	0.0274674	14.29	0.0352239
64	T-XUR	N：23º20.937' E：110º53.646'	07/27/14	2.50016	2.66221	1.81882	12.159	0.116055	0.560182	1.08076	0.224979	0.0247951	16.9365	0.0353131
65	XUR	N：23º23.557' E：110º55.022'	07/27/14	2.98398	2.86334	7.00199	1.29111	0.084698	1.68013	1.30117	0.395188	0.0332453	13.5007	0.0451578
66	T-XJR	N：23º30.364' E：110º19.704'	07/27/14	1.67506	2.58653	3.93048	0.26914	0.0448073	0.894904	0.586372	0.308951	0.0209536	11.5609	0.0268428
67	XJR	N：23º28.637' E：110º20.612'	07/27/14	2.66091	2.99668	6.51982	0.937179	0.0840325	1.36575	0.55118	0.440331	0.0246467	14.1341	0.0408456
68	T-XJR	N：23º27.087' E：111º30.237'	07/28/14	3.24874	2.58069	2.94133	9.41579	0.0497199	2.26631	0.845406	0.280484	0.041791	9.02576	0.0982883
69	XJR	N：23º20.329' E：111º31.631'	07/28/14	2.41915	3.01714	5.55408	0.725252	0.0869705	1.35076	0.710897	0.419095	0.0365207	12.9471	0.048151
70	T-XJR	N：23º07.208' E：111º49.460'	07/28/14	1.31795	2.91079	2.84763	0.396657	0.0438692	0.674553	0.649373	0.278978	0.0270797	8.85134	0.0425403
71	T-XJR	N：23º09.157' E：111º51.424'	07/28/14	2.27928	2.75619	2.31682	8.87786	0.0476845	0.640065	1.47793	0.266244	0.0229408	13.4678	0.0833636
72	XJR	N：23º07.908' E：111º55.040'	07/28/14	3.06112	3.36256	7.32758	0.354547	0.140354	1.55306	0.835432	0.526821	0.0450114	22.5433	0.0410116
73	T-XJR	N：23º05.709' E：112º07.908'	07/28/14	3.27128	2.77	1.98094	19.347	0.0385578	0.471462	0.622311	0.221134	0.033057	11.048	0.0556395
74	T-XJR	N：23º11.024' E：112º19.212'	07/28/14	5.74673	2.87046	2.54921	38.7816	0.123658	0.685731	1.03304	0.335687	0.0332946	8.63418	0.0607585
75	XJR	N：23º02.455' E：112º25.236'	07/29/14	2.78355	3.23234	7.03707	0.353666	0.1532	1.49109	0.541615	0.440097	0.0299712	14.6131	0.0316522
76	T-XJR	N：23º18.964' E：112º43.546'	07/29/14	3.26583	3.00081	4.18052	5.41973	0.0448342	2.6665	1.9418	0.425701	0.032701	6.95636	0.118192
77	T-XJR	N：23º17.430' E：112º45.794'	07/29/14	7.10468	3.06062	2.3902	49.6946	0.05495	0.781594	1.21978	0.475809	0.0477225	8.69253	0.0918572
78	T-XJR	N：23º26.364' E：112º52.835'	07/29/14	3.37439	3.18484	5.73618	0.868752	0.058113	1.59274	1.08723	0.687707	0.403657	10.6052	0.0288429
79	T-XJR	N：23º11.753' E：112º48.475'	07/29/14	2.46693	2.84978	3.89248	0.375169	0.0585713	1.74923	1.53836	0.744463	0.177729	9.76974	0.0320984
80	T-XJR	N：23º09.354' E：112º50.223'	07/29/14	2.38269	3.03684	4.61125	0.161119	0.0692897	1.65954	3.00735	0.672298	0.0698527	12.4763	0.0311515
81	XJR	N：23º06.474' E：112º47.941'	07/29/14	2.88812	3.41954	6.8767	0.153552	0.0803462	1.67714	0.633752	0.482321	0.0528424	15.984	0.0315529
Low flow season
1	NPR	N：25º54.376' E：103º57.101'	01/16/15	1.9474	1.52376	4.72968	0.430233	0.0527274	0.883906	0.556437	0.112617	0.0484342	7.98977	0.104192
2	NPR	N：25º36.971' E：103º49.532'	01/16/15	4.79264	2.25226	10.5772	0.680255	0.245557	3.03772	0.74547	0.36991	0.0746617	30.1584	0.0897613
3	NPR	N：25º17.512' E：103º51.405'	01/16/15	4.76143	1.80339	8.4572	0.175156	0.157017	4.95011	1.24669	0.258154	0.0340864	13.943	0.0507203
4	NPR	N：25º00.589' E：103º38.313'	01/16/15	4.06128	2.22981	9.18962	0.165157	0.216191	2.92815	1.58728	0.629188	0.0461384	15.6754	0.0517715
5	NPR	N：24º56.169' E：103º10.674'	01/17/15	5.39859	2.41513	8.32094	0.996541	0.240672	5.44489	2.50101	0.931508	0.0482144	27.1387	0.0630014
6	NPR	N：24º13.314' E：103º06.415'	01/17/15	4.61479	2.32164	8.89299	0.382496	0.177391	3.52586	1.21502	0.897616	0.0435959	31.4072	0.0951381
7	T-NPR	N：24º12.664' E：103º06.806'	01/17/15	5.16398	2.36283	12.0006	1.20294	0.163482	2.64677	0.332721	0.601365	0.0338847	46.7885	0.0701673
8	T-NPR	N：24º13.778' E：103º23.804'	01/17/15	4.23287	2.5333	9.32826	0.252409	0.147227	3.32849	0.925213	0.381399	0.0359859	15.6487	0.0471706
9	T-NPR	N：24º39.257' E：104º28.790'	01/18/15	3.52001	2.12599	8.96014	0.295865	0.111737	1.90232	0.401366	0.745267	0.0494435	14.964	0.0487185
10	NPR	N：24º39.293' E：104º28.732'	01/18/15	3.81402	2.19549	9.0551	0.425482	0.12993	2.4088	2.61777	0.765402	0.0387456	14.8959	0.0561566
11	T-NPR	N：24º46.524' E：104º32.253'	01/18/15	3.85797	2.201	8.93218	0.477815	0.125762	2.56337	0.5025	0.758312	0.0420891	14.5258	0.072591
12	T-NPR	N：25º11.607' E：104º54.663'	01/19/15	3.94301	2.05802	7.73992	0.370317	0.0964274	3.38748	2.37553	0.694007	0.0421282	12.289	0.0722799
13	NPR	N：24º52.129' E：105º01.755'	01/18/15	3.65712	1.67153	7.60789	1.22108	0.120677	2.29904	0.538401	1.81113	0.0548522	11.6955	0.122498
14	T-BPR	N：26º00.141' E：104º30.067'	01/15/15	4.39927	2.37948	9.02337	0.323946	0.111691	2.59757	4.48142	2.44304	0.0702898	28.73	0.0853871
15	T-BPR	N：26º17.388' E：104º42.789'	01/15/15	5.11978	2.32395	7.41389	0.37909	0.10309	3.39781	1.96375	1.31871	0.474181	27.9737	0.0670603
16	T-BPR	N：26º22.931' E：105º00.733'	01/14/15	19.0524	1.58297	5.21058	134.968	1.5735	3.45754	1.15366	0.827826	0.0561565	14.5258	0.0546678
17	T-BPR	N：26º26.503' E：105º04.567'	01/14/15	3.19039	2.27261	7.25433	0.388564	0.0993407	1.90447	0.496906	0.782247	0.0349799	20.534	0.0464182
18	T-BPR	N：26º10.138' E：105º11.266'	01/14/15	4.24589	2.0048	6.22927	0.218144	0.105748	4.57001	0.814832	0.693113	0.0803597	16.2256	0.0563568
19	T-BPR	N：25º40.338' E：105º39.591'	01/14/15	3.11086	2.02096	5.66149	0.151017	0.115741	2.45696	0.898822	0.757649	0.0795953	16.5335	0.0618047
20	T-BPR	N：26º00.774' E：105º40.083'	01/14/15	5.13565	1.57037	8.67066	0.387712	0.170547	4.85294	0.935051	0.77248	0.0386816	31.0955	0.0678844
21	T-BPR	N：25º53.339' E：105º38.595'	01/14/15	4.21737	1.6607	7.18549	0.281573	0.257422	4.06739	2.39319	0.84162	0.0292197	12.0687	0.163191
22	T-BPR	N：25º52.383' E：105º40.367'	01/14/15	3.49309	1.5794	8.37106	0.174359	0.156812	2.22942	0.426177	0.584959	0.0329535	16.2547	0.048713
23	T-BPR	N：25º31.932' E：105º45.989'	01/14/15	3.11307	1.73856	6.84938	0.213766	0.112374	2.06505	1.12467	0.697339	0.0429247	14.0844	0.085574
24	T-BPR	N：25º28.012' E：105º46.908'	01/13/15	3.14638	1.915	6.69078	0.286162	0.119448	2.18993	0.594663	0.769747	0.0441061	15.1823	0.0694581
25	T-BPR	N：25º23.054' E：105º45.477'	01/13/15	3.30757	1.85137	7.97659	0.229449	0.158882	1.86954	0.530402	0.87103	0.0333023	17.2442	0.071311
26	T-BPR	N：25º22.678' E：105º47.127'	01/13/15	3.62393	1.82477	5.98833	0.206156	0.116396	3.4112	5.58924	0.703998	0.0559192	14.4075	0.0658073
27	T-BPR	N：25º06.965' E：105º51.618'	01/13/15	3.00271	1.50936	7.13534	0.213255	0.214434	1.75577	0.548009	0.84376	0.0651986	10.679	0.0558396
28	T-BPR	N：25º07.095' E：105º51.757'	01/13/15	3.17035	1.79897	6.48264	0.463542	0.123103	2.20075	0.425147	0.781826	0.0612334	15.202	0.0780941
29	T-BPR	N：25º04.399' E：105º57.121'	01/13/15	13.5075	1.61984	6.28945	0.509757	0.122706	22.6974	43.8787	0.689768	0.0497965	13.7365	0.13954
30	T-BPR	N：25º02.840' E：105º55.993'	01/13/15	3.45812	1.64595	6.20436	0.188475	0.113648	3.0479	0.897289	0.65564	0.0549392	15.5398	0.0735019
31	T-BPR	N：24º09.598' E：106º05.519'	01/12/15	3.33438	1.59701	7.2178	0.23784	0.130069	2.22281	0.649028	0.563801	0.0587894	18.3933	0.0629829
32	T-BPR	N：24º56.984' E：106º08.133'	01/12/15	3.03482	1.68174	6.4882	0.297908	0.11206	2.01138	0.549329	0.772306	0.0663528	13.9255	0.0615796
33	NPR	N：24º56.894' E：106º08.749'	01/12/15	3.03703	1.77319	6.13473	0.386594	0.120016	1.97107	0.682764	0.928366	0.0921659	14.676	0.0682891
34	HSR	N：24º59.741' E：106º09.535'	01/12/15	2.86949	1.6381	6.8215	0.311035	0.100573	1.53883	0.484509	0.748621	0.0547933	14.6835	0.0601962
35	T-HSR	N：24º58.122' E：106º09.510'	01/12/15	2.94118	1.72564	6.8349	0.245426	0.100978	1.66063	0.446306	0.761427	0.0610299	14.7246	0.0625461
36	HSR	N：25º09.847' E：106º37.839'	01/22/15	4.56079	2.31974	7.51861	0.194887	0.134663	4.61205	1.54283	0.730673	0.0714837	13.8319	0.091097
37	T-HSR	N：26º05.865' E：106º38.245'	01/19/15	4.03832	1.64066	8.03372	2.13595	0.14113	3.15038	0.545165	0.774689	0.0469837	8.87374	0.0656449
38	T-HSR	N：25º27.515' E：106º46.701'	01/22/15	3.91698	1.90067	8.11455	1.80658	0.118612	2.9171	1.65137	0.682561	0.0365753	11.7385	0.0511145
39	T-HSR	N：25º04.082' E：106º57.780'	01/22/15	3.79182	2.00416	7.16298	0.679695	0.107996	3.32821	1.45995	0.482793	0.0424915	13.1629	0.0678106
40	HSR	N：24º59.919' E：107º10.015'	01/22/15	2.84979	2.19086	6.47296	0.187314	0.118107	1.93697	0.397065	0.655497	0.0300435	11.9984	0.0533766
41	T-HSR	N：24º50.647' E：107º19.850'	01/23/15	3.18331	2.07135	7.54935	0.202145	0.110668	1.99084	0.363952	0.562475	0.033208	14.634	0.0677821
42	T-HSR	N：24º31.637' E：107º45.463'	01/23/15	3.71145	1.97563	7.13833	0.183759	0.0963221	3.4869	3.93221	0.368608	0.0362549	8.38998	0.0462992
43	T-HSR	N：24º34.169' E：107º49.052'	01/23/15	4.28244	1.80729	7.14869	1.48549	0.138454	3.30993	2.71457	0.705263	0.24592	9.66898	0.0482008
44	T-QJR	N：24º42.316' E：108º02.125'	01/23/15	11.1587	2.08979	8.48876	0.260546	0.0999485	17.9132	21.8113	0.438171	0.026622	9.02747	0.040141
45	T-QJR	N：24º34.145' E：108º28.336'	01/23/15	4.13331	2.1121	9.08831	2.80211	0.468627	2.59998	0.582137	0.395101	0.0640139	10.1739	0.075988
46	T-QJR	N：24º30.130' E：108º37.738'	01/23/15	3.53255	2.1273	8.02511	0.861475	0.10815	2.28148	0.404929	0.497172	0.0537839	13.9077	0.0631793
47	T-QJR	N：24º32.325' E：109º14.632'	01/24/15	3.13216	1.94484	7.73276	0.161873	0.0957908	1.94608	0.367809	0.353608	0.0514581	11.1486	0.0395436
48	T-QJR	N：24º32.698' E：109º15.904'	01/24/15	1.94481	2.05916	3.3376	3.95819	0.0477339	0.800061	0.435353	0.237476	0.0314801	11.2186	0.0422116
49	T-QJR	N：24º32.082' E：109º14.962'	01/24/15	2.30621	1.92327	5.48396	0.196292	0.0690882	1.46029	0.380537	0.297337	0.034532	9.29454	0.0398782
50	T-QJR	N：23º50.551' E：109º31.877'	01/24/15	2.38476	2.1234	4.59698	0.423883	0.0569157	1.24354	0.531256	0.349706	0.0444529	29.922	0.0509122
51	QJR	N：23º40.025' E：109º40.139'	01/24/15	2.62245	2.02225	6.03866	0.252878	0.0879145	1.71555	0.557327	0.414158	0.0350027	10.2656	0.0637846
52	QJR	N：23º36.249' E：109º38.862'	01/24/15	2.96273	2.17442	6.85615	0.186348	0.0962241	1.98826	1.59795	0.509721	0.0347909	11.7468	0.0466688
53	QJR	N：23º24.696' E：110º04.310'	01/24/15	12.7549	2.05673	6.17445	0.807939	0.103722	22.7143	0.58204	0.453484	0.0383132	10.658	0.0331189
54	T-XUR	N：22º49.966' E：108º05.609'	01/27/15	3.59494	2.24304	8.99515	1.05542	0.0871126	1.75395	7.27548	0.242457	0.0241786	18.497	0.0616768
55	T-XUR	N：22º50.682' E：108º05.743'	01/27/15	3.48901	2.65075	8.11776	0.480988	0.12836	1.97109	0.65713	0.54293	0.049275	22.2727	0.0621103
56	T-XUR	N：22º49.395' E：108º11.372'	01/27/15	3.15732	2.55319	7.71672	0.685767	0.107129	1.82556	0.55116	0.404368	0.0471914	11.3425	0.0611522
57	T-XUR	N：22º54.480' E：109º34.174'	01/27/15	3.71226	2.99609	8.31904	0.54932	0.122431	1.87485	0.497202	0.906213	0.159481	19.035	0.0511292
58	T-XUR	N：23º22.370' E：110º04.851'	01/24/15	3.11637	2.60918	7.26428	0.748833	0.102441	1.83863	3.06663	0.515006	0.0325649	15.5384	0.0388662
59	XUR	N：23º26.103' E：110º07.647'	01/25/15	3.15304	2.3115	7.91443	0.454552	0.211983	1.76561	0.5103	0.549956	0.0414281	12.9276	0.0411734
60	XUR	N：23º25.594' E：110º31.940'	01/25/15	3.20542	2.31536	7.10481	0.824087	0.105655	2.05819	0.48516	0.54812	0.0399626	17.2518	0.0378464
61	T-XUR	N：23º24.980' E：110º31.817'	01/25/15	43.929	2.1783	4.31719	209.011	0.236933	37.3546	1.09538	0.169729	0.064792	32.3409	0.106499
62	XUR	N：23º25.359' E：110º32.275'	01/25/15	3.72244	2.26411	5.97114	0.246766	0.0949976	3.507	16.9878	0.480903	0.0515898	12.524	0.0387531
63	XUR	N：23º21.571' E：110º51.468'	01/25/15	2.9034	2.40171	6.76124	0.236767	0.108761	1.75441	0.561605	0.52372	0.0437576	15.8792	0.0434886
64	T-XUR	N：23º20.937' E：110º53.646'	01/25/15	20.6785	2.10731	4.05007	9.49345	0.174839	34.8604	115.731	0.211975	0.0325636	20.8609	0.0448912
65	XUR	N：23º23.557' E：110º55.022'	01/25/15	2.37004	2.03096	4.88235	1.59719	0.121903	1.2974	0.486175	0.374551	0.0303422	16.4604	0.0465306
66	T-XJR	N：23º30.364' E：110º19.704'	01/25/15	2.91662	2.25954	5.21527	0.51449	0.0794759	2.39054	1.42603	0.41008	0.0352436	18.5915	0.0569471
67	XJR	N：23º28.637' E：110º20.612'	01/25/15	5.38448	2.21602	5.73213	1.21192	0.0965453	7.08215	1.64153	0.516171	0.041519	18.573	0.0505302
68	T-XJR	N：23º27.087' E：111º30.237'	01/25/15	12.7891	2.19122	4.0251	0.884533	0.0527109	1.80321	6.14788	95.7527	0.310826	15.0114	0.0476784
69	XJR	N：23º20.329' E：111º31.631'	01/26/15	3.14773	2.22463	6.85157	0.228324	0.113628	1.83857	1.38807	1.4563	0.0437959	20.0912	0.0538682
70	T-XJR	N：23º07.208' E：111º49.460'	01/26/15	3.26241	2.34653	4.61188	0.619553	0.0481785	2.07894	12.8369	5.24843	0.0492485	17.0602	0.0354742
71	T-XJR	N：23º09.157' E：111º51.424'	01/26/15	3.13211	2.33484	2.67636	15.1963	0.0644814	0.474534	0.595438	0.378363	0.0298525	17.1356	0.120776
72	XJR	N：23º07.908' E：111º55.040'	01/26/15	3.75281	2.47892	6.42312	0.889118	0.112343	2.74483	3.73073	0.964409	0.0483071	17.2352	0.274037
73	T-XJR	N：23º05.709' E：112º07.908'	01/26/15	1.46252	2.36179	2.50798	0.712315	0.0286677	0.933957	0.408217	0.301657	0.0243245	13.7626	0.0368473
74	T-XJR	N：23º11.024' E：112º19.212'	01/26/15	33.515	2.36969	3.61672	267.334	0.636374	1.38186	3.20248	0.304015	0.0392039	10.2379	0.604021
75	XJR	N：23º02.455' E：112º25.236'	01/26/15	2.76259	2.48803	6.09633	0.742027	0.0893142	1.66322	0.792489	0.55129	0.0435254	16.6101	0.028761
76	T-XJR	N：23º18.964' E：112º43.546'	01/27/15	3.22931	2.47621	5.28322	2.89907	0.0594577	2.74503	1.01161	0.481735	0.0218466	12.307	0.0360165
77	T-XJR	N：23º17.430' E：112º45.794'	01/27/15	2.80695	2.50341	3.83675	0.533587	0.0447005	2.9252	4.84107	0.527172	0.0402816	13.1953	0.0327697
78	T-XJR	N：23º26.364' E：112º52.835'	01/27/15	7.5758	2.46024	4.35855	1.00538	0.0992159	3.00376	2.2314	1.07096	2.08728	14.1374	0.0495589
79	T-XJR	N：23º11.753' E：112º48.475'	01/26/15	4.88818	2.47089	4.62099	1.06016	0.09197	5.23243	1.86892	1.27007	0.149842	42.2726	0.0317381
80	T-XJR	N：23º09.354' E：112º50.223'	01/26/15	3.36461	2.32781	4.46752	0.446836	0.0892712	3.5132	1.7778	0.93523	0.0951825	13.4482	0.0421593
81	XJR	N：23º06.474' E：112º47.941'	01/26/15	3.7716	2.46477	6.31618	1.32202	0.0944922	3.4928	1.08154	0.600173	0.0376534	16.0928	0.052237
NPR, Nanpanjiang River; HSR, Hongshuihe River; QJR, Qianjiang River; XUJ, Xunjiang River; XJR, Xijiang River.
T-NPR, T-BPR, T-HSR, T-QJR, T-XUJ and T-XJR represents the tributaries of Nanpanjiang River, Beipanjiang River, Hongshuihe River, Qianjiang River, Xunjiang River and Xijiang River.
